# Supplementary material for: Development of a Microwave-Assisted Extraction Protocol for the Simultaneous Determination of Mycotoxins and Pesticide Residues in Apples by LC-MS/MS
Source: MDPI journal article supplement (doi:10.3390/app112210931), 2021-11-19
Supplement: s1 [file s1]

## Supplementary Materials

### Development of a Microwave Assisted Extraction protocol for the simultaneous determination of mycotoxins and pesticide residues in apples by LC-MS/MS

Natasa P. Kalogiouri, Emmanouil-Nikolaos Papadakis, Maria G. Maggalou, George S. Karaoglanidis, Victoria F. Samanidou and Urania Menkissoglu-Spiroudi.

**Table S1.** LC-MS/MS parameters.

| Analyte                      | Parent Ion | Product Ion | Polarity | Collision Energy (V) | Cone Voltage | Retention Time (RT) |
|------------------------------|------------|-------------|----------|----------------------|--------------|---------------------|
|                              |            | 305.0       | positive | 24                   |              |                     |
| abamectin                    | 890.6      | 567.0       |          | 15                   | 175          | 28.75               |
|                              |            | 90.1        | positive | 32                   |              |                     |
| acetamiprid                  | 223.0      | 126.0       |          | 22                   | 132          | 6.46                |
|                              |            | 180.7       | positive | 14                   |              |                     |
| acrinathrin                  | 559.1      | 207.7       |          | 14                   | 145          | 28.00               |
|                              |            | 146.8       | negative | 36                   |              |                     |
| alternariol                  | 256.9      | 212.8       |          | 25                   | 136          | 17.16               |
| alternariol monomethyl ether | 270.9      | 212.8       | negative | 39                   |              |                     |
|                              |            | 255.8       |          | 24                   | 162          | 21.07               |
|                              |            | 139.8       | positive | 18                   |              |                     |
| Boscalid                     | 343.0      | 306.9       |          | 19                   | 151          | 19.81               |
|                              |            | 108.1       | positive | 35                   |              |                     |
| bupirimate                   | 317.1      | 166.1       |          | 33                   | 120          | 21.72               |
|                              |            | 132.1       | positive | 31                   |              |                     |
| carbendazim                  | 192.2      | 160.0       |          | 18                   | 119          | 6.98                |
|                              |            | 96.9        | positive | 32                   |              |                     |
| chlorpyrifos                 | 349.8      | 197.8       |          | 21                   | 152          | 25.55               |
| chlorpyrifos methyl          |            | 124.9       | positive | 26                   |              |                     |
|                              | 321.8      | 289.8       |          | 19                   | 150          | 23.52               |
|                              |            | 204.9       | positive | 26                   |              |                     |
| citrinin                     | 251.3      | 232.9       |          | 17                   | 109          | 15.37               |
|                              |            | 101.9       | positive | 33                   |              |                     |
| clofentezine                 | 303.0      | 137.9       |          | 15                   | 140          | 23.13               |
|                              |            | 132.0       | positive | 17                   |              |                     |
| clothianidin                 | 250.1      | 169.1       |          | 12                   | 131          | 5.15                |
|                              |            | 70.1        | positive | 25                   |              |                     |
| cyproconazole                | 292.0      | 125.0       |          | 32                   | 124          | 20.58               |
|                              |            | 77.0        | positive | 39                   |              | 22.31               |

|                    |       |       |          |    |     |       |
|--------------------|-------|-------|----------|----|-----|-------|
| cyprodinil         | 226.1 | 93.0  |          | 34 | 129 |       |
|                    |       | 181.0 | positive | 44 |     |       |
| deltamethrin       | 522.9 | 280.7 |          | 16 | 147 | 27.53 |
|                    |       | 251.0 | positive | 29 |     |       |
| difenoconazole     | 406.0 | 337.0 |          | 14 | 151 | 23.43 |
|                    |       | 107.0 | positive | 36 |     |       |
| etofenprox         | 394.2 | 177.0 |          | 14 | 126 | 30.12 |
|                    |       | 70.0  | positive | 19 |     |       |
| fenbuconazole      | 337.1 | 124.9 |          | 33 | 144 | 21.65 |
|                    |       | 134.9 | positive | 33 |     |       |
| fenpyroximate      | 422.2 | 366.0 |          | 15 | 139 | 26.65 |
|                    |       | 173.9 | positive | 19 |     |       |
| flonicamid         | 230.0 | 202.9 |          | 19 | 160 | 3.74  |
|                    |       | 126.1 | negative | 33 |     |       |
| fludioxonil        | 247.1 | 169.1 |          | 37 | 126 | 19.79 |
|                    |       | 173.0 | positive | 29 |     |       |
| fluopyram          | 397.1 | 208.1 |          | 21 | 99  | 20.92 |
|                    |       | 306.8 | positive | 28 |     |       |
| fluquinconazole    | 376.0 | 348.9 |          | 19 | 154 | 20.79 |
|                    |       | 108.9 | positive | 33 |     |       |
| flutriafol         | 302.1 | 122.8 |          | 29 | 91  | 17.42 |
|                    |       | 167.9 | positive | 24 |     |       |
| hexythiazox        | 353.1 | 227.9 |          | 14 | 134 | 25.48 |
|                    |       | 158.9 | positive | 32 |     |       |
| imazalil           | 297.1 | 200.9 |          | 17 | 134 | 20.06 |
|                    |       | 149.8 | positive | 24 |     |       |
| indoxacarb         | 528.1 | 202.8 |          | 41 | 172 | 23.73 |
| kresoxim methyl    |       | 116.0 | positive | 33 |     |       |
|                    | 314.1 | 206.1 |          | 10 | 142 | 22.05 |
| lambda cyhalothrin |       | 141.0 | positive | 42 |     |       |
|                    | 467.0 | 224.9 |          | 16 | 142 | 26.95 |
|                    |       | 132.9 | positive | 24 |     |       |
| methoxyfenozide    | 369.2 | 148.9 |          | 17 | 141 | 20.17 |
|                    |       | 70.1  | positive | 20 |     |       |
| myclobutanil       | 289.1 | 124.9 |          | 32 | 120 | 20.59 |
|                    |       | 80.9  | negative | 14 |     |       |
| patulin            | 153.1 | 108.9 |          | 12 | 109 | 2.63  |
|                    |       | 70.0  | positive | 15 |     |       |
| penconazole        | 284.1 | 158.9 |          | 32 | 128 | 22.37 |
|                    |       | 72.1  | positive | 22 |     |       |
| pirimicarb         | 239.1 | 182.1 |          | 16 | 109 | 16.39 |
|                    |       | 162.9 | positive | 23 |     |       |
| pyraclostrobin     | 388.1 | 194.0 |          | 12 | 115 | 22.84 |
|                    |       | 82.2  | positive | 23 |     |       |
| pyrimethanil       | 200.3 | 107.2 |          | 25 | 130 | 19.18 |

|                 |       |       |          |    |     |       |
|-----------------|-------|-------|----------|----|-----|-------|
| pyriproxyfen    |       | 95.9  | positive | 15 |     |       |
|                 | 322.1 | 128.9 |          | 34 | 123 | 25.28 |
|                 |       | 98.0  | positive | 40 |     |       |
| spinosin A      | 732.4 | 142.0 |          | 31 | 153 | 24.15 |
|                 |       | 98.0  | positive | 40 |     |       |
| spinosin D      | 746.6 | 141.9 |          | 30 | 148 | 25.08 |
|                 |       | 212.8 | positive | 32 |     |       |
| spirodiclofen   | 411.0 | 312.8 |          | 10 | 165 | 26.58 |
|                 |       | 180.8 | positive | 32 |     |       |
| tau-fluvalinate | 520.2 | 207.8 |          | 16 | 135 | 28.70 |
|                 |       | 70.0  | positive | 20 |     |       |
| tebuconazole    | 308.2 | 124.9 |          | 35 | 125 | 22.41 |
|                 |       | 132.9 | positive | 21 |     |       |
| tebufenozide    | 353.1 | 296.9 |          | 11 | 136 | 21.75 |
|                 |       | 116.9 | positive | 39 |     |       |
| tebufenpyrad    | 334.1 | 144.9 |          | 28 | 153 | 24.70 |
|                 |       | 131.1 | positive | 32 |     |       |
| thiabendazole   | 202.1 | 175.1 |          | 25 | 131 | 10.09 |
|                 |       | 126.0 | positive | 23 |     |       |
| thiacloprid     | 253.0 | 186.0 |          | 15 | 152 | 8.89  |
|                 |       | 181.0 | positive | 16 |     |       |
| thiamethoxam    | 291.9 | 211.0 |          | 13 | 144 | 3.63  |
|                 |       | 185.9 | positive | 20 |     |       |
| trifloxystrobin | 409.1 | 205.9 |          | 13 | 128 | 23.77 |

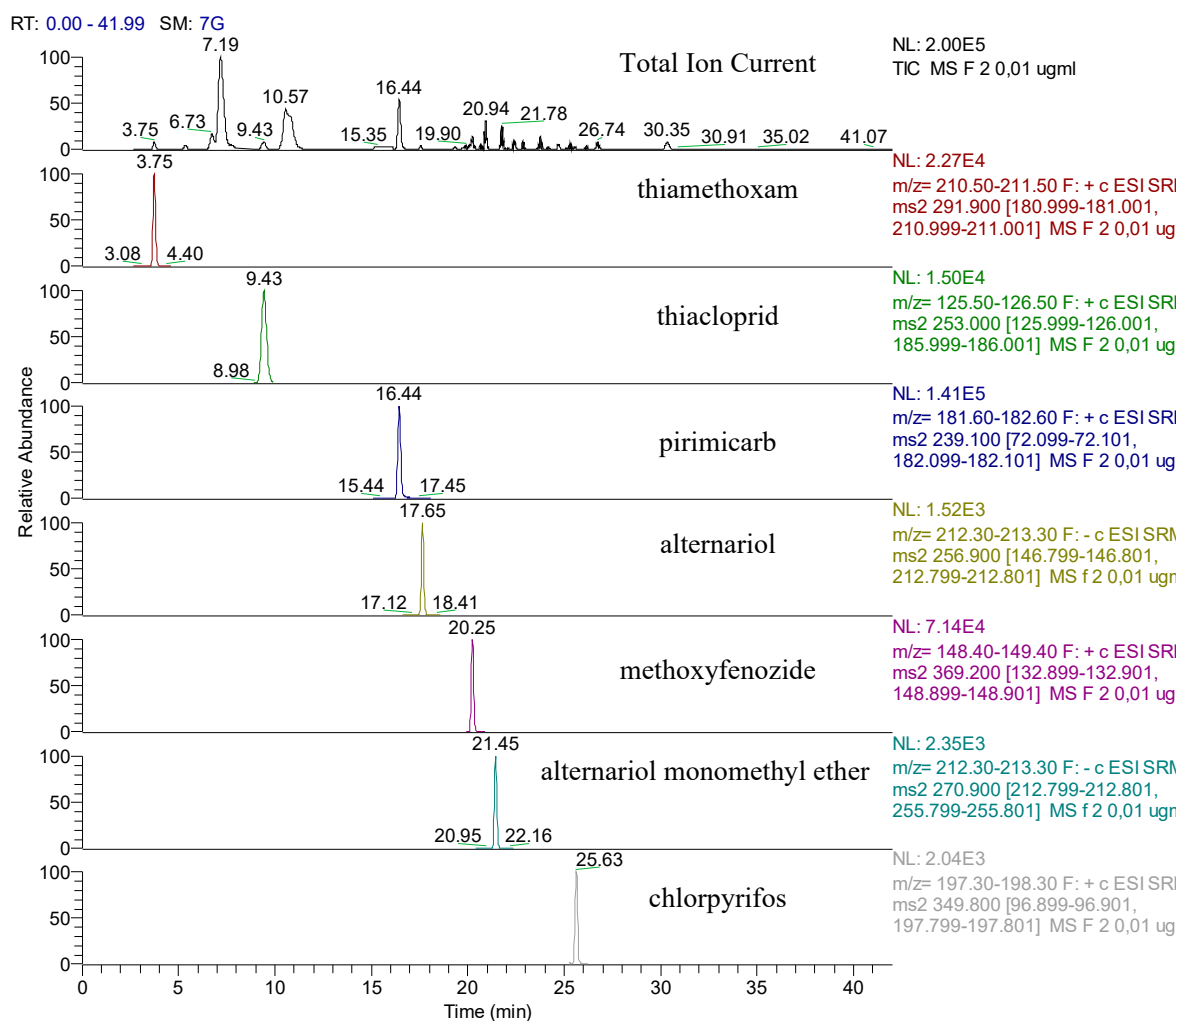

**Figure S1.** Total Ion Current and selected SRM chromatograms from a 0.01 µg/g level fortified apple sample.

**Table S2.** Recoveries (%) obtained using acetonitrile, ethyl acetate, methanol, and water as extraction solvents.

| Compound                     | RE% |       |      |       |
|------------------------------|-----|-------|------|-------|
|                              | ACN | AcOEt | MeOH | Water |
| abamectin (B1a)              | 63  | 28    | 45   | 20    |
| acetamiprid                  | 73  | 89    | 55   | 98    |
| acrinathrin                  | 77  | 28    | 30   | 28    |
| alternariol                  | 72  | 89    | 44   | 41    |
| alternariol monomethyl ether | 76  | 77    | 43   | 29    |
| boscalid                     | 81  | 82    | 54   | 58    |
| bupirimate                   | 84  | 89    | 52   | 71    |
| carbendazim                  | 83  | 109   | 60   | 101   |
| chlorpyrifos                 | 57  | 34    | 26   | 29    |
| chlorpyrifos-methyl          | 45  | 42    | 20   | 16    |

|                    |    |     |    |     |
|--------------------|----|-----|----|-----|
| citrinin           | 12 | 63  | 26 | 30  |
| clofentezine       | 73 | 54  | 28 | 21  |
| clothianidin       | 70 | 91  | 53 | 108 |
| cyproconazole      | 77 | 87  | 50 | 71  |
| cyprodinil         | 77 | 83  | 44 | 60  |
| deltamethrin       | 69 | 24  | 33 | 19  |
| difenoconazole     | 74 | 60  | 37 | 30  |
| etofenprox         | 80 | 28  | 40 | 24  |
| fenbuconazole      | 82 | 71  | 45 | 47  |
| fenpyroximate      | 82 | 31  | 40 | 31  |
| flonicamid         | 56 | 86  | 51 | 96  |
| fludioxonil        | 77 | 73  | 50 | 35  |
| fluopyram          | 81 | 76  | 53 | 65  |
| fluquinconazole    | 81 | 75  | 52 | 58  |
| flutriafol         | 79 | 91  | 49 | 128 |
| hexythiazox        | 81 | 37  | 36 | 21  |
| imazalil           | 75 | 101 | 50 | 84  |
| indoxacarb         | 77 | 28  | 36 | 29  |
| kresoxym-methyl    | 79 | 68  | 48 | 59  |
| lambda-cyhalothrin | 70 | 25  | 37 | 26  |
| methoxyfenozide    | 84 | 79  | 54 | 77  |
| myclobutanil       | 79 | 83  | 50 | 60  |
| patulin            | 53 | 28  | 25 | 5   |
| penconazole        | 78 | 83  | 47 | 50  |
| pirimicarb         | 82 | 90  | 51 | 75  |
| pyraclostrobin     | 91 | 48  | 42 | 31  |
| pyrimethanil       | 73 | 88  | 46 | 79  |
| pyriproxyfen       | 80 | 33  | 35 | 23  |
| spinosyn A         | 74 | 93  | 48 | 44  |
| spinosyn D         | 73 | 90  | 46 | 28  |
| spirodiclofen      | 89 | 30  | 38 | 27  |
| tau-fluvalinate    | 53 | 23  | 35 | 23  |
| tebuconazole       | 80 | 83  | 47 | 51  |
| tebufenozide       | 84 | 72  | 56 | 63  |
| tebufenpyrad       | 81 | 47  | 40 | 26  |
| thiabendazole      | 63 | 85  | 49 | 97  |
| thiacloprid        | 74 | 90  | 54 | 94  |
| thiamethoxam       | 61 | 75  | 51 | 100 |
| trifloxystrobin    | 86 | 35  | 44 | 45  |

**Table S3.** Recoveries (%) obtained using acetonitrile as extraction solvent at different temperatures (60°C, 80°C, 100°C).

| Compounds                    | RE (%) |       |        |
|------------------------------|--------|-------|--------|
|                              | 60 °C  | 80 °C | 100 °C |
| abamectin (B1a)              | 63     | 54    | 5      |
| acetamiprid                  | 73     | 71    | 14     |
| acrinathrin                  | 77     | 22    | 7      |
| alternariol                  | 72     | 13    | 12     |
| alternariol monomethyl ether | 76     | 11    | 12     |
| boscalid                     | 81     | 70    | 12     |
| bupirimate                   | 84     | 62    | 9      |
| carbendazim                  | 83     | 77    | 16     |
| chlorpyrifos                 | 57     | 29    | 6      |
| chlorpyrifos-methyl          | 45     | 23    | 9      |
| citrinin                     | 12     | 3     | 3      |
| clofentezine                 | 73     | 24    | 5      |
| clothianidin                 | 70     | 76    | 14     |
| cyproconazole                | 77     | 70    | 11     |
| cyprodinil                   | 77     | 57    | 9      |
| deltamethrin                 | 69     | 38    | 9      |
| difenoconazole               | 74     | 46    | 8      |
| etofenprox                   | 80     | 34    | 4      |
| fenbuconazole                | 82     | 64    | 11     |
| fenpyroximate                | 82     | 33    | 4      |
| flonicamid                   | 56     | 84    | 12     |
| fludioxonil                  | 77     | 11    | 10     |
| fluopyram                    | 81     | 70    | 10     |
| fluquinconazole              | 81     | 62    | 12     |
| flutriafol                   | 79     | 70    | 20     |
| hexythiazox                  | 81     | 35    | 7      |
| imazalil                     | 75     | 58    | 15     |
| indoxacarb                   | 77     | 43    | 10     |
| kresoxym-methyl              | 79     | 70    | 10     |
| lambda-cyhalothrin           | 70     | 32    | 9      |
| methoxyfenozide              | 84     | 75    | 12     |
| myclobutanil                 | 79     | 70    | 12     |
| patulin                      | 53     | 6     | 8      |
| penconazole                  | 78     | 61    | 9      |

|                 |    |     |    |
|-----------------|----|-----|----|
| pirimicarb      | 82 | 70  | 11 |
| pyraclostrobin  | 91 | 51  | 10 |
| pyrimethanil    | 73 | 70  | 11 |
| pyriproxyfen    | 80 | 37  | 6  |
| spinosyn A      | 74 | 50  | 12 |
| spinosyn D      | 73 | 34  | 5  |
| spirodiclofen   | 89 | 30  | 3  |
| tau-fluvalinate | 53 | 38  | 2  |
| tebuconazole    | 80 | 59  | 11 |
| tebufenozide    | 84 | 73  | 11 |
| tebufenpyrad    | 81 | 43  | 9  |
| thiabendazole   | 63 | 43  | 12 |
| thiacloprid     | 74 | 70  | 14 |
| thiamethoxam    | 61 | 112 | 14 |
| trifloxystrobin | 86 | 53  | 10 |

**Table S4.** Recoveries (%) obtained using ethyl acetate as extraction solvent at different temperatures (60°C, 80°C, 100°C).

| Compounds                    | Recoveries (%) |       |        |
|------------------------------|----------------|-------|--------|
|                              | 60 °C          | 80 °C | 100 °C |
| abamectin (B1a)              | 28             | 25    | 31     |
| acetamiprid                  | 89             | 77    | 68     |
| acrinathrin                  | 28             | 6     | 23     |
| alternariol                  | 89             | 78    | 74     |
| alternariol monomethyl ether | 77             | 72    | 71     |
| boscalid                     | 82             | 82    | 88     |
| bupirimate                   | 89             | 74    | 88     |
| carbendazim                  | 109            | 89    | 91     |
| chlorpyrifos                 | 34             | 31    | 60     |
| chlorpyrifos-methyl          | 42             | 43    | 55     |
| citrinin                     | 63             | 48    | 11     |
| clofentezine                 | 54             | 45    | 55     |
| clothianidin                 | 91             | 82    | 90     |
| cyproconazole                | 87             | 81    | 81     |
| cyprodinil                   | 83             | 72    | 81     |
| deltamethrin                 | 24             | 25    | 55     |
| difenoconazole               | 60             | 55    | 64     |

|                    |     |    |     |
|--------------------|-----|----|-----|
| etofenprox         | 28  | 25 | 52  |
| fenbuconazole      | 71  | 72 | 75  |
| fenpyroximate      | 31  | 30 | 56  |
| flonicamid         | 86  | 85 | 85  |
| fludioxonil        | 73  | 77 | 72  |
| fluopyram          | 76  | 76 | 84  |
| fluquinconazole    | 75  | 75 | 78  |
| flutriafol         | 91  | 83 | 87  |
| hexythiazox        | 37  | 37 | 63  |
| imazalil           | 101 | 70 | 96  |
| indoxacarb         | 28  | 25 | 51  |
| kresoxym-methyl    | 68  | 73 | 78  |
| lambda-cyhalothrin | 25  | 23 | 55  |
| methoxyfenozide    | 79  | 80 | 84  |
| myclobutanil       | 83  | 84 | 84  |
| patulin            | 28  | 55 | 24  |
| penconazole        | 83  | 80 | 77  |
| pirimicarb         | 90  | 81 | 107 |
| pyraclostrobin     | 48  | 50 | 65  |
| pyrimethanil       | 88  | 84 | 86  |
| pyriproxyfen       | 33  | 37 | 71  |
| spinosyn A         | 93  | 54 | 57  |
| spinosyn D         | 90  | 74 | 41  |
| spirodiclofen      | 30  | 26 | 52  |
| tau-fluvalinate    | 23  | 25 | 54  |
| tebuconazole       | 83  | 83 | 78  |
| tebufenozide       | 72  | 76 | 77  |
| tebufenpyrad       | 47  | 43 | 63  |
| thiabendazole      | 85  | 75 | 111 |
| thiacloprid        | 90  | 83 | 81  |
| thiamethoxam       | 75  | 73 | 76  |
| trifloxystrobin    | 35  | 33 | 59  |



**Table S5.** Recoveries (%) obtained in the absence of acids, and after the addition of 1% CH<sub>3</sub>COOH, 5% CH<sub>3</sub>COOH, and 1% HCOOH.

| Compounds                    | Recoveries (%) |                         |                         |          |
|------------------------------|----------------|-------------------------|-------------------------|----------|
|                              | No Added Acid  | 1% CH <sub>3</sub> COOH | 5% CH <sub>3</sub> COOH | 1% HCOOH |
| abamectin (B1a)              | 50             | 98                      | 21                      | 64       |
| acetamiprid                  | 72             | 87                      | 33                      | 83       |
| acrinathrin                  | 30             | 87                      | 31                      | 58       |
| alternariol                  | 59             | 80                      | 65                      | 80       |
| alternariol monomethyl ether | 53             | 82                      | 75                      | 80       |
| boscalid                     | 67             | 82                      | 25                      | 94       |
| bupirimate                   | 67             | 90                      | 32                      | 80       |
| carbendazim                  | 72             | 91                      | 34                      | 87       |
| chlorpyrifos                 | 38             | 61                      | 19                      | 60       |
| chlorpyrifos-methyl          | 35             | 37                      | 13                      | 30       |
| clofentezine                 | 38             | 64                      | 28                      | 60       |
| clothianidin                 | 74             | 86                      | 33                      | 83       |
| cyproconazole                | 69             | 83                      | 34                      | 82       |
| cyprodinil                   | 62             | 83                      | 33                      | 71       |
| deltamethrin                 | 41             | 88                      | 29                      | 72       |
| difenoconazole               | 54             | 75                      | 29                      | 75       |
| etofenprox                   | 43             | 82                      | 31                      | 70       |
| fenbuconazole                | 63             | 84                      | 32                      | 80       |
| fenpyroximate                | 50             | 90                      | 28                      | 79       |
| flonicamid                   | 75             | 84                      | 33                      | 80       |
| fludioxonil                  | 52             | 76                      | 70                      | 66       |
| fluopyram                    | 74             | 86                      | 36                      | 80       |
| fluquinconazole              | 70             | 83                      | 38                      | 81       |
| flutriafol                   | 72             | 84                      | 33                      | 79       |
| hexythiazox                  | 50             | 82                      | 27                      | 77       |

|                    |    |    |    |    |
|--------------------|----|----|----|----|
| imazalil           | 65 | 89 | 32 | 74 |
| indoxacarb         | 50 | 80 | 31 | 78 |
| kresoxym-methyl    | 70 | 85 | 32 | 75 |
| lambda-cyhalothrin | 44 | 78 | 31 | 59 |
| methoxyfenozide    | 77 | 91 | 37 | 92 |
| myclobutanil       | 70 | 85 | 36 | 76 |
| penconazole        | 64 | 84 | 32 | 76 |
| pirimicarb         | 72 | 86 | 33 | 80 |
| pyraclostrobin     | 58 | 83 | 35 | 84 |
| pyrimethanil       | 70 | 81 | 33 | 71 |
| pyriproxyfen       | 50 | 90 | 29 | 90 |
| spinosyn A         | 45 | 91 | 37 | 80 |
| spinosyn D         | 45 | 90 | 27 | 74 |
| spirodiclofen      | 49 | 83 | 29 | 67 |
| tau-fluvalinate    | 46 | 89 | 29 | 73 |
| tebuconazole       | 68 | 81 | 35 | 77 |
| tebufenozide       | 79 | 93 | 40 | 90 |
| tebufenpyrad       | 56 | 85 | 31 | 73 |
| thiabendazole      | 72 | 89 | 32 | 74 |
| thiacloprid        | 73 | 87 | 36 | 84 |
| thiamethoxam       | 77 | 91 | 35 | 90 |
| trifloxystrobin    | 64 | 80 | 33 | 81 |

**Table S6.** Regression equation and correlation coefficients of pure standards and spiked extracts.

| Compounds                    | Standard Solution in Solvent     |                | Matrix Matched       |                |
|------------------------------|----------------------------------|----------------|----------------------|----------------|
|                              | Calibration Curve                | R <sup>2</sup> | Calibration Curve    | R <sup>2</sup> |
| abamectin (B1a)              | y=2.977e2 x-3.972e <sup>3</sup>  | 0.9926         | y =3.317e2 x-4.893e3 | 0.9918         |
| acetamiprid                  | y=3.435e4 x+ 3.735e <sup>5</sup> | 0.9903         | y =3.449e4 x+2.734e5 | 0.9945         |
| acrinathrin                  | y=2.865e2 x-8.143e <sup>3</sup>  | 0.9909         | y =3.291e2 x-1.068e3 | 0.9901         |
| alternariol                  | y=1.454e3 x+1.043e4              | 0.9914         | y =1.992e3 x+5.127e3 | 0.9902         |
| alternariol monomethyl ether | y=1.054e4 x+2.058e5              | 0.9929         | y =1.466e4 x+2.414e5 | 0.9904         |
| boscalid                     | y=1.01e4 x+3.656e4               | 0.9941         | y =9.995e3 x+8.54e3  | 0.9938         |
| bupirimate                   | y= 1.342e4 x+1.618e5             | 0.9915         | y =1.325e4 x+2.001e5 | 0.9902         |

|                     |                           |        |                           |        |
|---------------------|---------------------------|--------|---------------------------|--------|
| carbendazim         | $y = 1.118e5 x + 5.775e5$ | 0.9911 | $y = 2.067e5 x + 4.217e6$ | 0.9928 |
| chlorpyrifos        | $y = 8.586e2 x + 1.96e4$  | 0.9911 | $y = 9.361e2 x + 4.582e1$ | 0.9905 |
| chlorpyrifos methyl | $y = 2.775e2 x - 3.668e3$ | 0.9914 | $y = 3.426e2 x - 6.883e2$ | 0.9906 |
| clofentezine        | $y = 3.925e3 x + 1.303e4$ | 0.9924 | $y = 2.728e3 x + 8.353e3$ | 0.9902 |
| clothianidin        | $y = 4.507e3 x + 1.957e4$ | 0.9908 | $y = 6.183e3 x - 3.514e3$ | 0.9905 |
| cyproconazole       | $y = 8.288e3 x + 1.596e4$ | 0.9920 | $y = 8.19e3 x + 4.103e4$  | 0.9940 |
| cyprodinil          | $y = 7.479e3 x + 1.06e4$  | 0.9912 | $y = 7.577e3 x + 4.565e4$ | 0.9906 |
| deltamethrin        | $y = 2.983e2 x - 6.906e3$ | 0.9904 | $y = 6.169e2 x - 5.886e3$ | 0.9906 |
| difenoconazole      | $y = 1.019e4 x + 1.132e5$ | 0.9925 | $y = 1.221e4 x + 2.93e4$  | 0.9906 |
| etofenprox          | $y = 2.316e3 x + 2.143e4$ | 0.9966 | $y = 9.119e3 x - 4.378e4$ | 0.9942 |
| fenbuconazole       | $y = 5.119e3 x + 3.844e4$ | 0.9903 | $y = 5.873e3 x + 1.989e3$ | 0.9901 |
| fenpyroximate       | $y = 9.995e3 x + 1.591e5$ | 0.9914 | $y = 2.614e4 x - 2.238e5$ | 0.9912 |
| flonicamid          | $y = 3.375e3 x + 2.027e4$ | 0.9909 | $y = 2.649e3 x - 1.331e4$ | 0.9952 |
| fludioxonil         | $y = 2.172e3 x + 7.735e4$ | 0.9924 | $y = 2.742e3 x + 5.014e4$ | 0.9908 |
| fluopyram           | $y = 4.09e4 x + 1.979e5$  | 0.9903 | $y = 4.232e4 x + 3.669e5$ | 0.9963 |
| fluquinconazole     | $y = 3.968e3 x + 2.778e3$ | 0.9962 | $y = 3.327e3 x + 6.612e3$ | 0.9979 |
| flutriafol          | $y = 6.202e3 x - 4.518e3$ | 0.9922 | $y = 5.649e3 x + 4.074e4$ | 0.9914 |
| hexythiazox         | $y = 4.855e3 x + 3.766e4$ | 0.9904 | $y = 5.268e3 x - 1.176e4$ | 0.9904 |
| imazalil            | $y = 8.084e3 x + 1.034e5$ | 0.9916 | $y = 1.005e4 x + 1.271e4$ | 0.9924 |
| indoxacarb          | $y = 9.104e2 x + 1.165e4$ | 0.9914 | $y = 1.093e3 x + 9.942e3$ | 0.9904 |
| kresoxym-methyl     | $y = 1.451e3 x + 8.419e3$ | 0.9909 | $y = 1.472e3 x + 4.097e3$ | 0.9901 |
| lambda-cyhalothrin  | $y = 1.849e2 x - 4.726e3$ | 0.9968 | $y = 3.717e2 x - 3.972e3$ | 0.9906 |
| methoxyfenozide     | $y = 1.52e4 x + 2.698e5$  | 0.9930 | $y = 1.954e4 x + 2.191e5$ | 0.9903 |
| myclobutanil        | $y = 9.711e3 x - 1.587e4$ | 0.9937 | $y = 9.166e3 x + 2.55e4$  | 0.9981 |
| penconazole         | $y = 1.088e4 x + 7.269e4$ | 0.9929 | $y = 1.049e4 x + 3.471e4$ | 0.9907 |
| pirimicarb          | $y = 8.883e4 x + 8.844e5$ | 0.9909 | $y = 8.105e4 x + 7.413e5$ | 0.9930 |
| pyraclostrobin      | $y = 6.192e3 x + 2.461e4$ | 0.9917 | $y = 9.155e3 x - 3.709e4$ | 0.9902 |
| pyrimethanil        | $y = 4.684e3 x + 2.389e4$ | 0.9927 | $y = 4.66e3 x + 7.508e3$  | 0.9954 |
| pyriproxyfen        | $y = 3.688e3 x + 1.019e5$ | 0.9908 | $y = 8.726e3 x - 5.447e4$ | 0.9912 |
| spinosyn A          | $y = 2.622e3 x - 1.271e4$ | 0.9925 | $y = 3.944e3 x + 3.554e4$ | 0.9902 |
| spinosyn D          | $y = 1.568e3 x - 6.469e3$ | 0.9909 | $y = 3.016e3 x + 2.066e4$ | 0.9905 |
| spirodiclofen       | $y = 2.19e2 x - 1.196e3$  | 0.9908 | $y = 2.778e2 x - 5.617e3$ | 0.9905 |
| tau-fluvalinate     | $y = 6.292e2 x - 1.522e4$ | 0.9901 | $y = 8.966e2 x - 3.867e3$ | 0.9920 |
| tebuconazole        | $y = 6.567e3 x + 2.219e4$ | 0.9941 | $y = 4.737e3 x + 5.593e4$ | 0.9903 |
| tebufenozide        | $y = 1.583e4 x + 3.251e5$ | 0.9913 | $y = 1.806e4 x + 3.079e5$ | 0.9912 |
| tebufenpyrad        | $y = 9.106e3 x + 1.59e4$  | 0.9903 | $y = 7.469e3 x + 8.691e3$ | 0.9908 |
| thiabendazole       | $y = 6.728e4 x - 3.907e5$ | 0.9953 | $y = 1.185e5 x + 9.159e5$ | 0.9996 |
| thiacloprid         | $y = 1.585e4 x + 3.961e5$ | 0.9952 | $y = 1.719e4 x + 7.731e4$ | 0.9952 |
| thiamethoxam        | $y = 5.791e3 x + 6.562e4$ | 0.9903 | $y = 1.214e4 x + 5.024e3$ | 0.9969 |
| trifloxystrobin     | $y = 1.615e4 x + 1.557e5$ | 0.9905 | $y = 1.626e4 x + 6.562e4$ | 0.9901 |

**Table S7.** Matrix effect results.

| <b>Compound</b>              | <b>ME%</b> | <b>Signal Response</b> |
|------------------------------|------------|------------------------|
| abamectin (B1a)              | 111        | -                      |
| acetamiprid                  | 100        | -                      |
| acrinathrin                  | 115        | -                      |
| alternariol                  | 137        | -                      |
| alternariol monomethyl ether | 139        | -                      |
| boscalid                     | 99         | -                      |
| bupirimate                   | 99         | -                      |
| carbendazim                  | 185        | Signal enhancement     |
| chlorpyrifos                 | 109        | -                      |
| chlorpyrifos methyl          | 123        | -                      |
| clofentezine                 | 70         | -                      |
| clothianidin                 | 137        | -                      |
| cyproconazole                | 99         | -                      |
| cyprodinil                   | 101        | -                      |
| deltamethrin                 | 207        | Signal enhancement     |
| difenoconazole               | 120        | -                      |
| etofenprox                   | 394        | Signal enhancement     |
| fenbuconazole                | 115        | -                      |
| fenpyroximate                | 262        | Signal enhancement     |
| flonicamid                   | 78         | -                      |
| fludioxonil                  | 126        | -                      |
| fluopyram                    | 103        | -                      |
| fluquinconazole              | 84         | -                      |
| flutriafol                   | 91         | -                      |
| hexythiazox                  | 109        | -                      |
| imazalil                     | 124        | -                      |
| indoxacarb                   | 120        | -                      |
| kresoxym-methyl              | 101        | -                      |
| lambda-cyhalothrin           | 201        | Signal enhancement     |
| methoxyfenozide              | 129        | -                      |
| myclobutanil                 | 94         | -                      |
| penconazole                  | 96         | -                      |
| pirimicarb                   | 91         | -                      |
| pyraclostrobin               | 148        | Signal enhancement     |
| pyrimethanil                 | 99         | -                      |
| pyriproxyfen                 | 237        | Signal enhancement     |
| spinosyn A                   | 150        | Signal enhancement     |
| spinosyn D                   | 192        | Signal enhancement     |
| spirodiclofen                | 127        | -                      |

|                 |     |                    |
|-----------------|-----|--------------------|
| tau-fluvalinate | 142 | Signal enhancement |
| tebuconazole    | 72  | -                  |
| tebufenozide    | 114 | -                  |
| tebufenpyrad    | 82  | -                  |
| thiabendazole   | 176 | Signal enhancement |
| thiacloprid     | 108 | -                  |
| thiamethoxam    | 210 | Signal enhancement |
| trifloxystrobin | 101 | -                  |
